# Supplementary material
Source: Copernicus journal article supplement (doi:10.5194/egusphere-2026-1958)
Supplement: Supplementary file 1 [file egusphere-2026-1958-supplement.pdf]

1 Supplement of  
2 **BHRR v1.0: a two-stage Transformer framework for simultaneous**  
3 **spatial restoration and quantile-function bias correction of climate**  
4 **model temperature fields**

5 Young Hoon Song<sup>1</sup>, Hyung Ju Kim<sup>2</sup> Eun-Sung Chung<sup>2\*</sup>

6 <sup>1</sup> Department of Applied Artificial  
7 Intelligence, Seoul National University of Science and Technology, 232 Gongneung-ro, Nowon-  
8 gu, Seoul 01811, Korea

9 <sup>2</sup> Faculty of Civil Engineering, Seoul National University of Science and Technology, 232 Gong  
10 neung-ro, Nowon-gu, Seoul 01811, Korea

11  
12 \* Correspondence to: Eun-Sung Chung [eschung@seoultech.ac.kr](mailto:eschung@seoultech.ac.kr)

13  
14  
15  
16  
17  
18  
19  
20  
21  
22  
23

### Köppen-Geiger climate zones (Oceania)

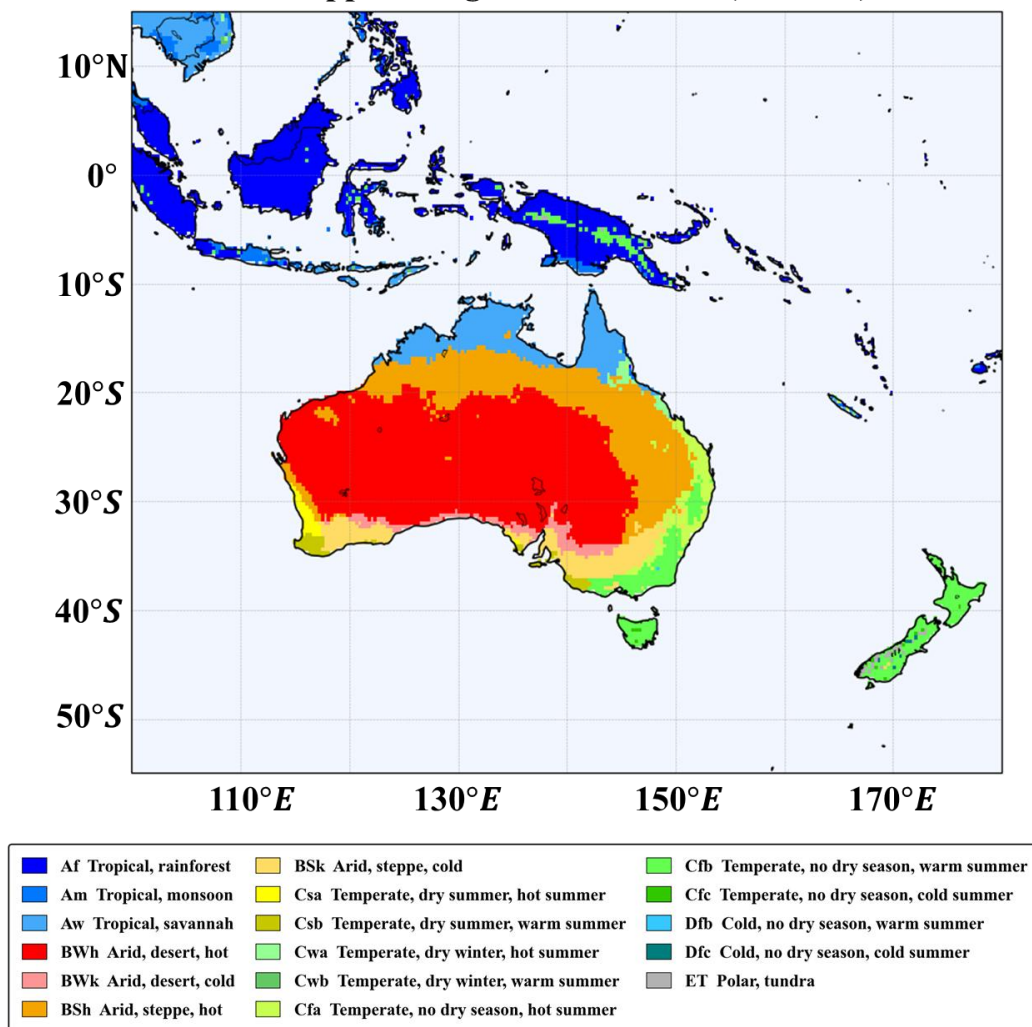

24

25 **Fig. S1.** Köppen-Geiger climate zones over the Oceania study domain

26

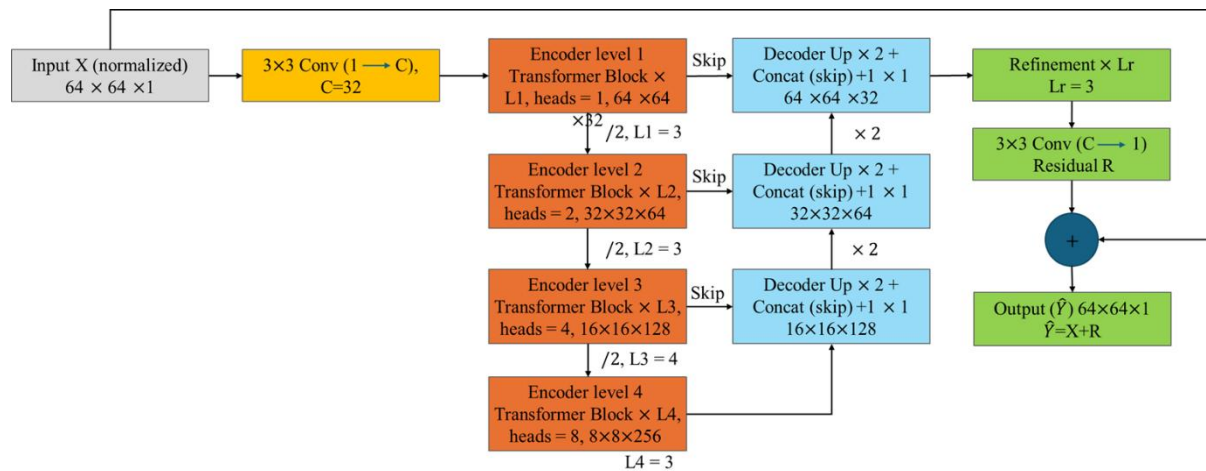

27

28 **Fig. S2.** Restormer (Zamir et al., 2021) architecture used for patch-based climate field restoration

29

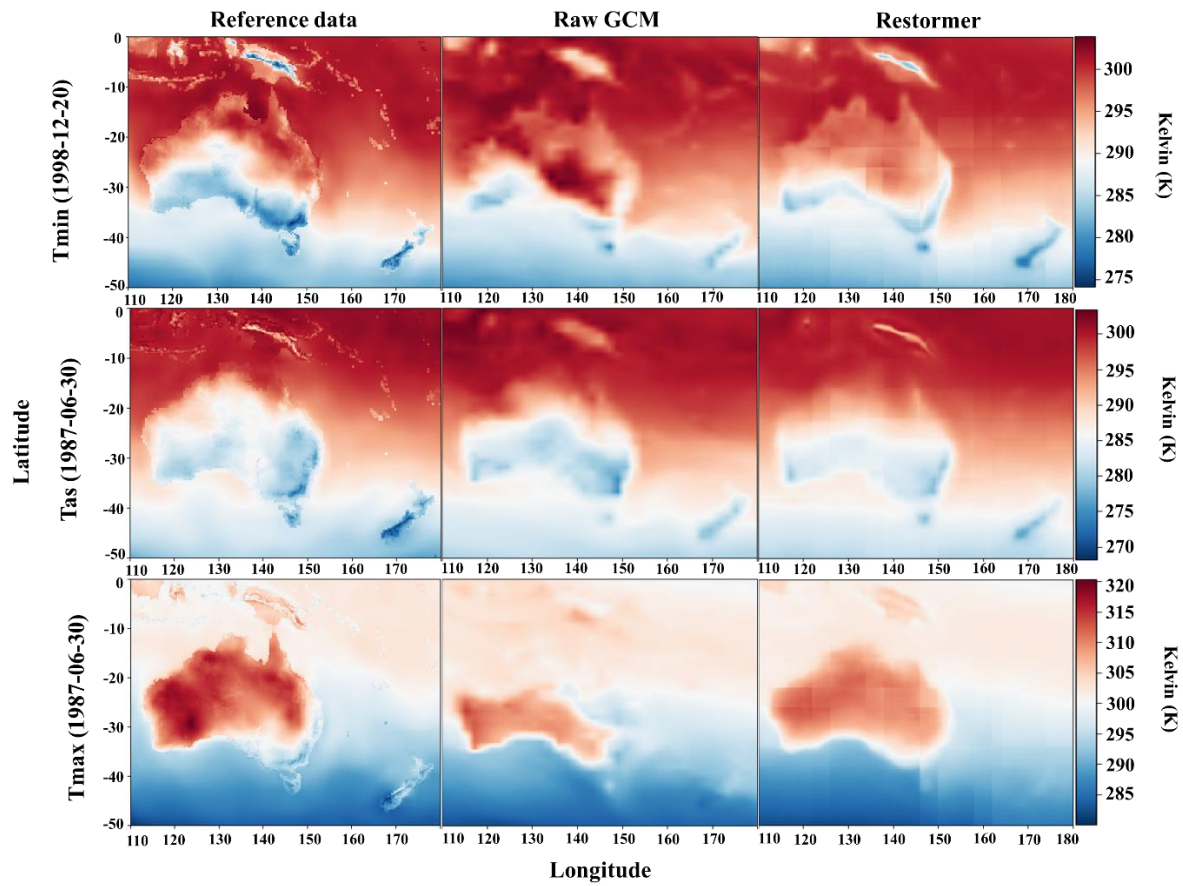

30

31 **Fig. S3.** Spatial comparison of three daily temperature predictions on randomly selected dates across  
 32 Oceania

33

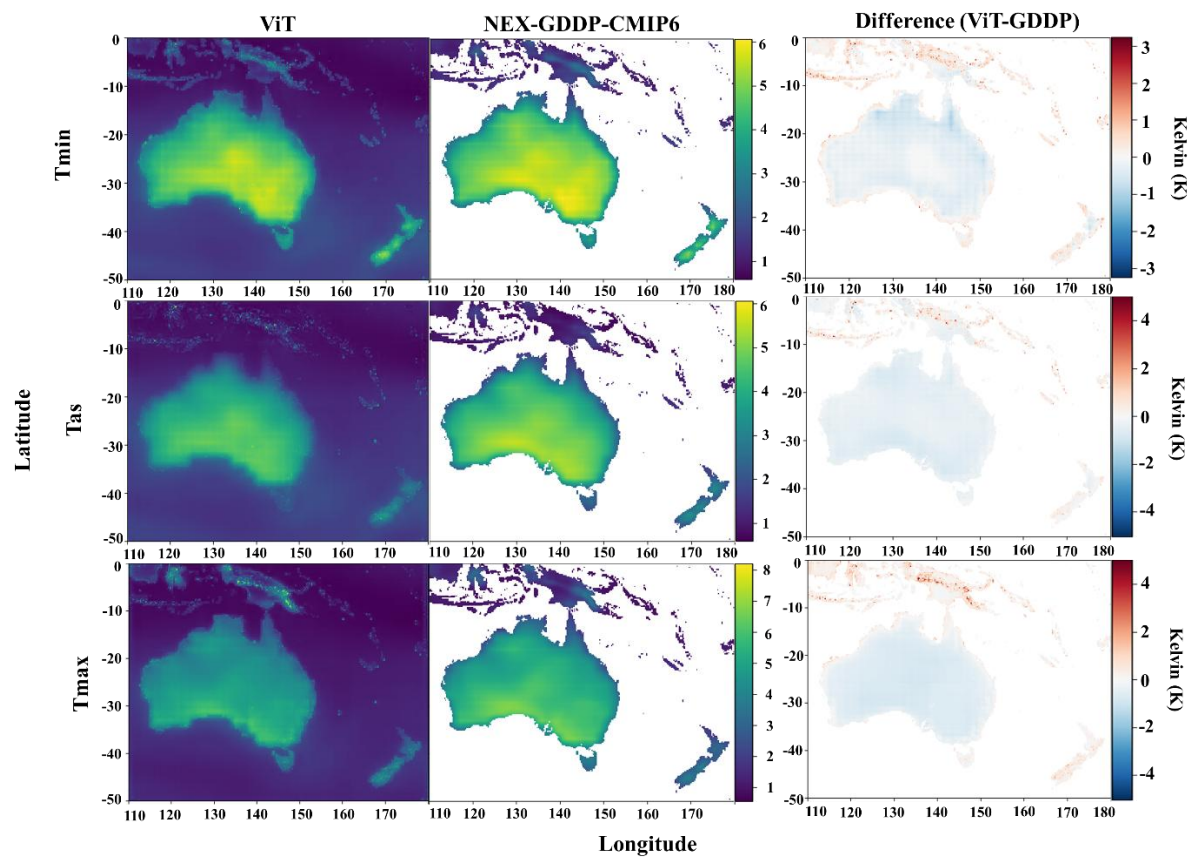

34

35 **Fig. S4.** Spatial distribution of RMSE for ViT-based bias correction and NEX-GDDP for Tmin, Tas, and  
 36 Tmax over Oceania (1980-2014)

37

38

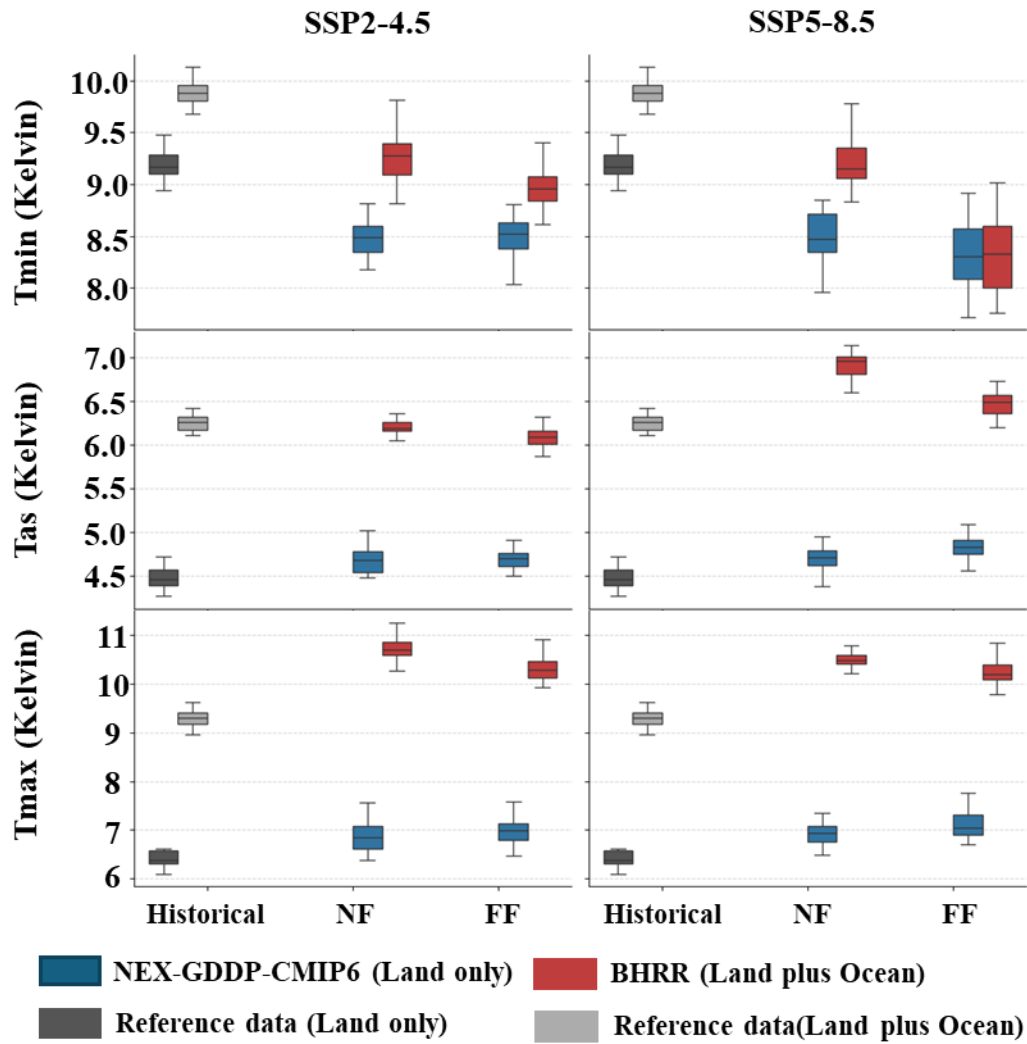

39

40 **Fig. S5.** Boxplots of spatial STDEV for three climate variables over Oceania for historical reference and  
 41 for BHRR and NEX-GDDP-CMIP6 in NF and FF under SSP2-4.5 and SSP5-8.5

42
